# Supplementary material
Source: PubMed Central journal article supplement (PMC3911227)
Supplement: AEM.02834-13_zam999105094so1.pdf [file AEM.02834-13_zam999105094so1.pdf]

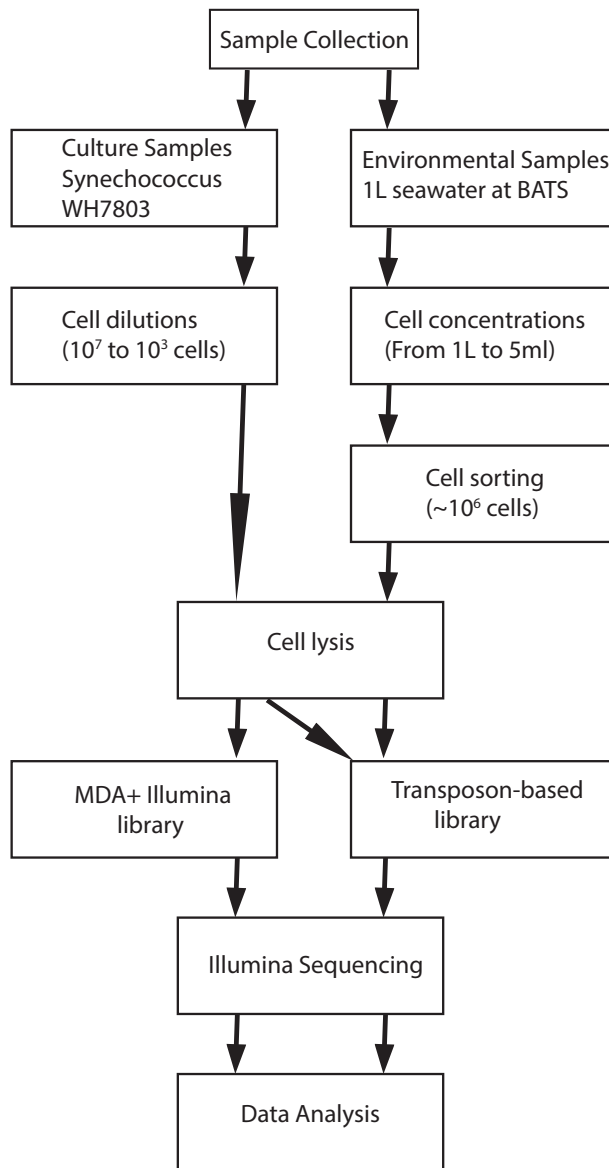

Figure S1: Overview of the steps of the method used for targeted metagenomic sequencing of *Prochlorococcus* and *Synechococcus* for environmental and culture samples.

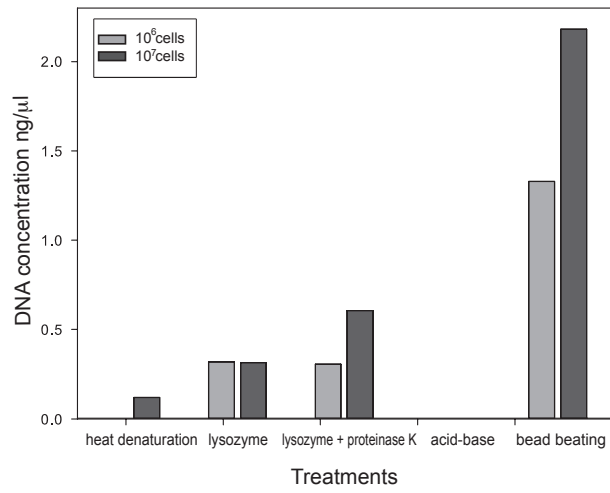

Figure S2: Outcome of different cell lysis treatments (a to e) as a function of DNA concentration in ng/μl on the sorted *Synechococcus* cells with two starting amounts of DNA.

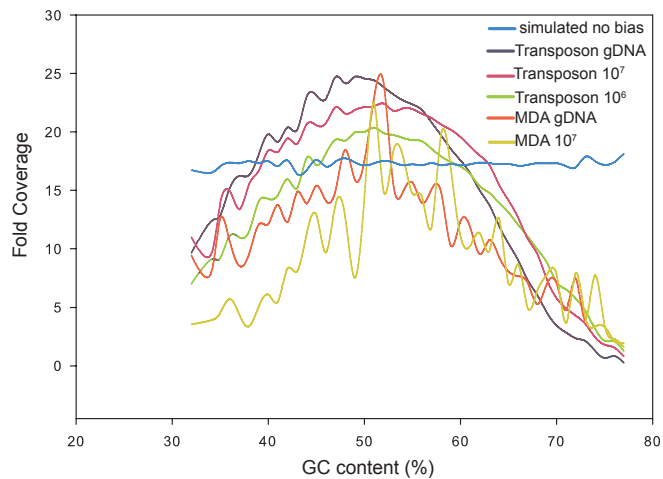

Figure S3: Mean coverage depth for genomic regions defined by GC content was analyzed for different DNA starting amounts and method: transposon-based and MDA. The “no bias” curve represents same size-matched fragments randomly selected (x100) from the reference genome to model non-biased coverage. There was no significant effect of treatment (gDNA vs. 10<sup>7</sup> vs. 10<sup>6</sup>) for the transposon based technique ( $P > 0.05$ ) and no difference in bias toward the simulated no bias line ( $P > 0.05$ ). There was a significant effect of treatment (gDNA vs 10<sup>7</sup>) and bias toward the simulated no bias line for the MDA technique ( $P < 0.05$ ). There was no significant effect of bias of both gDNA's when compared to the simulated line ( $P > 0.05$ ) but there was significant differences between MDA and transposon-based technique ( $P < 0.05$ ) (Welch's t test). gDNA is equivalent to 2ng of genomic DNA used as input for each method.

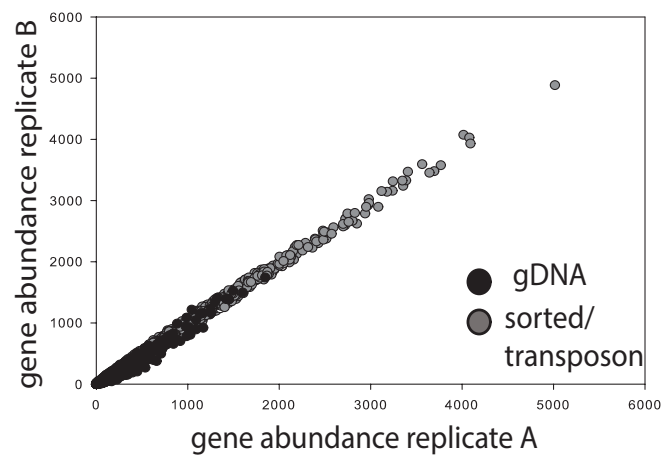

Figure S4: Relationship between the replicated samples for each bulk environmental genomic DNA and sorted *Synechococcus* transposon sample not normalized to the same number of matched sequences.

Table S1: Location, sampling date and corresponding environmental and sequencing values of samples analyzed

| Sample            | Environment | Position      | Date      | Depth (m) | %Matches | FCM (10 <sup>6</sup> ) | Method     | Cell sorting           |
|-------------------|-------------|---------------|-----------|-----------|----------|------------------------|------------|------------------------|
| B258proS (rep 1)  | Atlantic    | 31 40N 61 10W | May 2010  | Surface   | 11.35    | 3.0                    | MDA        | <i>Prochlorococcus</i> |
| B258proS (rep 2)  | Atlantic    | 31 40N 61 10W | May 2010  | Surface   | 18.89    | 2.8                    | MDA        | <i>Prochlorococcus</i> |
| B258pro80 (rep 1) | Atlantic    | 31 40N 61 10W | May 2010  | 80m       | 40.72    | 2.4                    | MDA        | <i>Prochlorococcus</i> |
| B258pro80 (rep 2) | Atlantic    | 31 40N 61 10W | May 2010  | 80m       | 43.86    | 2.2                    | MDA        | <i>Prochlorococcus</i> |
| B258synS (rep 1)  | Atlantic    | 31 40N 61 10W | May 2010  | Surface   | 16.06    | 3.1                    | MDA        | <i>Synechococcus</i>   |
| B258synS (rep 2)  | Atlantic    | 31 40N 61 10W | May 2010  | Surface   | 16.98    | 3.0                    | MDA        | <i>Synechococcus</i>   |
| B261proS (rep 1)  | Atlantic    | 31 40N 61 10W | Aug 2010  | Surface   | 41.30    | 3.6                    | Transposon | <i>Prochlorococcus</i> |
| B261proS (rep 2)  | Atlantic    | 31 40N 61 10W | Aug 2010  | Surface   | 41.26    | 3.0                    | Transposon | <i>Prochlorococcus</i> |
| B261pro80 (rep 1) | Atlantic    | 31 40N 61 10W | Aug 2010  | Surface   | 66.69    | 10                     | Transposon | <i>Prochlorococcus</i> |
| B261pro80 (rep 2) | Atlantic    | 31 40N 61 10W | Aug 2010  | Surface   | 66.63    | 10                     | Transposon | <i>Prochlorococcus</i> |
| B261synS (rep 1)  | Atlantic    | 31 40N 61 10W | Aug 2010  | Surface   | 96.32    | 1.9                    | Transposon | <i>Synechococcus</i>   |
| B261synS (rep 2)  | Atlantic    | 31 40N 61 10W | Aug 2010  | Surface   | 96.34    | 1.5                    | Transposon | <i>Synechococcus</i>   |
| B261syn80 (rep 1) | Atlantic    | 31 40N 61 10W | Aug 2010  | 80m       | 92.27    | 1.0                    | Transposon | <i>Synechococcus</i>   |
| B261syn80 (rep 2) | Atlantic    | 31 40N 61 10W | Aug 2010  | 80m       | 92.31    | 1.0                    | Transposon | <i>Synechococcus</i>   |
| B270proS          | Atlantic    | 31 40N 61 10W | June 2011 | Surface   | 25.64    | 1.5                    | Transposon | <i>Prochlorococcus</i> |
| B270pro80         | Atlantic    | 31 40N 61 10W | June 2011 | 80m       | 53.81    | 2.0                    | Transposon | <i>Prochlorococcus</i> |
| B270synS          | Atlantic    | 31 40N 61 10W | June 2011 | Surface   | 96.18    | 1.0                    | Transposon | <i>Synechococcus</i>   |
| B272pro80         | Atlantic    | 31 40N 61 10W | Aug 2011  | 80m       | 35.36    | 2.0                    | Transposon | <i>Prochlorococcus</i> |

|          |          |                |           |         |       |     |            |                      |
|----------|----------|----------------|-----------|---------|-------|-----|------------|----------------------|
| B272synS | Atlantic | 31 40N 61 10W  | Aug 2011  | Surface | 95.36 | 1.0 | Transposon | <i>Synechococcus</i> |
| B262synS | Atlantic | 31 40N 61 10W  | Sept 2010 | Surface | 90.25 | 1.0 | Transposon | <i>Synechococcus</i> |
| B263synS | Atlantic | 31 40N 61 10W  | Oct 2010  | Surface | 96.06 | 1.0 | Transposon | <i>Synechococcus</i> |
| B264synS | Atlantic | 31 40N 61 10W  | Nov 2010  | Surface | 96.19 | 1.0 | Transposon | <i>Synechococcus</i> |
| CA-1A    | Pacific  | 31 40N 61 10W  | Feb 2011  | Surface | 59.57 | 3.0 | Transposon | <i>Synechococcus</i> |
| CA-1B    | Pacific  | 33 22N 117 59W | Feb 2011  | Surface | 65.08 | 3.0 | Transposon | <i>Synechococcus</i> |
| CA1      | Pacific  | 33 22N 117 59W | Feb 2011  | Surface | 8.90  | -   | Tru-Seq    | Bulk/no sorting      |
| CA2      | Pacific  | 33 22N 117 59W | Feb 2011  | Surface | 5.84  | -   | Tru-Seq    | Bulk/no sorting      |

Table S2: Details of the data set used based on sequencing values (NX is the transposon-based method)

| Sample                    | #Sequences (10 <sup>6</sup> ) | %Matches | %Covered | Coverage     |
|---------------------------|-------------------------------|----------|----------|--------------|
| <b>NX-gDNA</b>            | 1.25                          | 86.03    | 99.56    | <b>27.16</b> |
| <b>NX-10<sup>7</sup></b>  | 1.25                          | 58.91    | 99.12    | <b>16.54</b> |
| <b>NX-10<sup>6</sup></b>  | 1.25                          | 58.81    | 99.80    | <b>16.45</b> |
| <b>NX-10<sup>5</sup></b>  | 1.25                          | 47.76    | 99.81    | <b>13.72</b> |
| <b>NX-10<sup>4</sup></b>  | 1.25                          | 14.59    | 97.79    | <b>3.73</b>  |
| <b>NX-10<sup>3</sup></b>  | 1.25                          | 1.69     | 28.89    | <b>0.43</b>  |
| <b>MDA-gDNA</b>           | 1.25                          | 47.71    | 64.14    | <b>14.84</b> |
| <b>MDA-10<sup>7</sup></b> | 1.25                          | 14.68    | 82.34    | <b>4.53</b>  |
| <b>MDA-10<sup>6</sup></b> | 1.25                          | 11.78    | 34.90    | <b>3.39</b>  |
| <b>MDA-10<sup>5</sup></b> | 1.25                          | 5.72     | 11.07    | <b>1.75</b>  |
| <b>MDA-10<sup>4</sup></b> | 1.25                          | 4.44     | 97.19    | <b>1.25</b>  |
| <b>MDA-10<sup>3</sup></b> | 1.25                          | 0.08     | 28.78    | <b>0.02</b>  |

Table S3: Summary of phosphate and nitrogen acquisition gene sequences used in this study using *Synechococcus* WH8102 and *Prochlorococcus* MED4 as references. Nitrogen genes in *Prochlorococcus* were generated and not found in genebank.

| Genes ID   |             |                    |
|------------|-------------|--------------------|
| genes      | WH8102      | Med4               |
| phoB       | NP_897040.1 | NP_892823.1        |
| phoR       | NP_897041.1 | NP_892824.1        |
| 707        |             | NP_892825.1        |
| phoA       |             | NP_892826.1        |
| phoE       | NP_898316.1 | NP_892827.1        |
| pstS       | NP_897111.1 | NP_892828.1        |
| chrA       | NP_897416.1 | NP_892829.1        |
| mfs        | NP_896893.1 | NP_892830.1        |
| gap1       | NP_896892.1 | NP_892831.1        |
| 714        | NP_896891.1 | NP_892832.1        |
| 715        |             | NP_892833.1        |
| arsA       | NP_897132.1 | NP_892834.1        |
| 717        |             | NP_892835.1        |
| ptrA       | NP_897112.1 | NP_892836.1        |
| 719        | NP_896959.1 | NP_892837.1        |
| 720        |             | NP_892838.1        |
| 721        |             | NP_892839.1        |
| 722        |             | NP_892840.1        |
| pstC       | NP_897363.1 | NP_892841.1        |
| pstA       | NP_897364.1 | NP_892842.1        |
| pstB       | NP_897365.1 | NP_892843.1        |
| sphX       | NP_897379.1 |                    |
| AP1        | NP_896391.1 |                    |
| AP2        | NP_898479.1 |                    |
| AP3        | NP_898480.1 |                    |
| psiP1      | NP_896260.1 |                    |
| som        | NP_898315.1 |                    |
| phoX (syn) | NP_897890.1 |                    |
| phoX-1     |             | NC_999991protein1  |
| phoX-2     |             | NC_999991protein2  |
| nirA       | NP_898566.1 | NC_999999protein1  |
| moaD       | NP_898562.1 | NC_999999protein10 |
| narX1      | NP_898555.1 | NC_999999protein11 |
| nirX       | NP_898578.1 | NC_999999protein12 |
| narX2      | NP_898554.1 | NC_999999protein13 |
| narB       | NP_898553.1 | NC_999999protein2  |
| moaA       | NP_898549.1 | NC_999999protein3  |
| moaB1      | NP_898563.1 | NC_999999protein4  |
| moaE       | NP_898561.1 | NC_999999protein5  |
| mobA       | NP_898550.1 | NC_999999protein6  |
| moeA       | NP_898558.1 | NC_999999protein7  |
| napA       |             | NC_999999protein8  |
| napA1      | NP_898551.1 |                    |
| napA2      | NP_898552.1 |                    |
| moaC       | NP_898557.1 | NC_999999protein9  |

Table S4: GenBank accession numbers for the metagenomes

| Accession  | Alias                                   | Description                                   |
|------------|-----------------------------------------|-----------------------------------------------|
| SRR1029009 | <a href="#">B258_pro25-1a</a>           | B258 <i>Prochlorococcus</i> surface rep 1     |
| SRR1029010 | <a href="#">B258_pro25-1b</a>           | B258 <i>Prochlorococcus</i> surface rep 2     |
| SRR1029011 | <a href="#">B258_pro26-1a</a>           | B258 <i>Prochlorococcus</i> 80m rep 1         |
| SRR1029012 | <a href="#">B258_pro26-1b</a>           | B258 <i>Prochlorococcus</i> 80m rep 1         |
| SRR1029013 | <a href="#">B258_syn25-1a</a>           | B258 <i>Synechococcus</i> surface rep 1       |
| SRR1029014 | <a href="#">B258_syn25-1b</a>           | B258 <i>Synechococcus</i> surface rep 2       |
| SRR1029015 | <a href="#">NXca1Aa</a>                 | California Current <i>Synechococcus</i> rep 1 |
| SRR1029016 | <a href="#">NXca1Ab</a>                 | California Current <i>Synechococcus</i> rep 2 |
| SRR1029018 | <a href="#">CA1A_gDNA</a>               | Bulk DNA California Current rep 1             |
| SRR1029019 | <a href="#">CA1B_gDNA</a>               | Bulk DNA California Current rep 1             |
| SRR1029020 | <a href="#">NXproSa</a>                 | B261 <i>Prochlorococcus</i> surface rep 1     |
| SRR1029021 | <a href="#">NXproSb</a>                 | B261 <i>Prochlorococcus</i> surface rep 2     |
| SRR1029022 | <a href="#">NXpro80a</a>                | B261 <i>Prochlorococcus</i> 80m rep 1         |
| SRR1029023 | <a href="#">NXpro80b</a>                | B261 <i>Prochlorococcus</i> 80m rep 2         |
| SRR1029024 | <a href="#">NXsynSa</a>                 | B261 <i>Synechococcus</i> surface rep 1       |
| SRR1029025 | <a href="#">NXsynSb</a>                 | B261 <i>Synechococcus</i> surface rep 2       |
| SRR1029026 | <a href="#">NXsyn80a</a>                | B261 <i>Synechococcus</i> 80 m rep 1          |
| SRR1029028 | <a href="#">NXsyn80b</a>                | B261 <i>Synechococcus</i> 80 m rep 2          |
| SRR1029034 | <a href="#">B270proS_CCTGGT_L002_R1</a> | B270 <i>Prochlorococcus</i> surface           |
| SRR1029035 | <a href="#">B270pro80_TCTTTG_L00</a>    | B270 <i>Prochlorococcus</i> 80m               |



| Accession  | Alias                                    | Description                       |
|------------|------------------------------------------|-----------------------------------|
|            | <a href="#">2_R1</a>                     |                                   |
| SRR1029036 | <a href="#">B270synS_AGTTGG_L002_R1</a>  | B270 <i>Synechococcus</i> surface |
| SRR1029037 | <a href="#">B272synS_GTTATG_L002_R1</a>  | B272 <i>Synechococcus</i> surface |
| SRR1029038 | <a href="#">B272pro80_CGACTT_L003_R1</a> | B272 <i>Prochlorococcus</i> 80m   |
| SRR1029039 | <a href="#">B262synS_ACCTTT_L001_R1</a>  | B262 <i>Synechococcus</i> surface |
| SRR1029040 | <a href="#">B263synS_GACACG_L001_R1</a>  | B263 <i>Synechococcus</i> surface |
| SRR1029041 | <a href="#">B264synS_ACGTCC_L001_R1</a>  | B264 <i>Synechococcus</i> surface |

Table S5: GenBank accession numbers for the cultured *Synechococcus* WH7803

| Accession  | Alias                   | Description                      |
|------------|-------------------------|----------------------------------|
| SRR1029108 | <a href="#">mdaC3</a>   | MDA 10 <sup>3</sup> cells        |
| SRR1029109 | <a href="#">mdaC4</a>   | MDA 10 <sup>4</sup> cells        |
| SRR1029110 | <a href="#">mdaC5</a>   | MDA 10 <sup>5</sup> cells        |
| SRR1029111 | <a href="#">mdaC6</a>   | MDA 10 <sup>6</sup> cells        |
| SRR1029112 | <a href="#">mdaC7</a>   | MDA 10 <sup>7</sup> cells        |
| SRR1029114 | <a href="#">mdapos1</a> | MDA gDNA                         |
| SRR1029115 | <a href="#">nxC3</a>    | Transposon 10 <sup>3</sup> cells |
| SRR1029133 | <a href="#">nxC4</a>    | Transposon 10 <sup>4</sup> cells |

| <b>Accession</b> | <b>Alias</b>           | <b>Description</b>               |
|------------------|------------------------|----------------------------------|
| SRR1029135       | <a href="#">nxC5</a>   | Transposon 10 <sup>5</sup> cells |
| SRR1029136       | <a href="#">nxC6</a>   | Transposon 10 <sup>6</sup> cells |
| SRR1029138       | <a href="#">nxC7</a>   | Transposon 10 <sup>7</sup> cells |
| SRR1029139       | <a href="#">nxpos1</a> | Transposon gDNA                  |
